1 **TITLE**

2 Multi-ethnic genome-wide association study of decomposed cardioelectric phenotypes illustrates  
3 strategies to identify and characterize evidence of shared genetic effects for complex traits

4 **AUTHORS AND AFFILIATIONS**

5 Antoine R. Baldassari<sup>1\*</sup>, Colleen M. Sitlani<sup>2</sup>, Heather M. Highland<sup>1</sup>, Dan E. Arking<sup>3</sup>, Steve Buyske<sup>4</sup>,  
6 Dawood Darbar<sup>5</sup>, Rahul Gondalia<sup>1</sup>, Misa Graff<sup>1</sup>, Xiuqing Guo<sup>6,7</sup>, Susan R. Heckbert<sup>8</sup>, Lucia A. Hindorff<sup>9</sup>,  
7 Chani J. Hodonsky<sup>1</sup>, Yii-Der Ida Chen<sup>6,7</sup>, Robert C. Kaplan<sup>10</sup>, Ulrike Peters<sup>11</sup>, Wendy Post<sup>12</sup>, Alex P.  
8 Reiner<sup>11</sup>, Jerome I. Rotter<sup>6,7</sup>, Ralph V. Shoher<sup>13</sup>, Amanda A. Seyerle<sup>14</sup>, Nona Sotoodehnia<sup>8</sup>, Ran Tao<sup>15</sup>,  
9 Kent D. Taylor<sup>6,7</sup>, Genevieve L Wojcik<sup>16</sup>, Jie Yao<sup>6,7</sup>, Eimear E. Kenny<sup>17,18,19,20</sup>, Henry J. Lin<sup>6,7</sup>, Elsayed Z.  
10 Soliman<sup>21</sup>, Eric A. Whitsel<sup>1</sup>, Kari E. North<sup>1,22</sup>, Charles Kooperberg<sup>11</sup>, Christy L. Avery<sup>1</sup>

11  
12 <sup>1</sup> Gillings School of Global Public Health, University of North Carolina at Chapel Hill, Chapel Hill NC  
13 <sup>2</sup> Cardiovascular Health Research Unit, Department of Medicine, University of Washington, Seattle, WA  
14 <sup>3</sup> McKusick-Nathans Institute of Genetic Medicine, Johns Hopkins University School of Medicine,  
15 Baltimore, MD  
16 <sup>4</sup> Department of Statistics & Biostatistics, Rutgers University, New Brunswick, NJ  
17 <sup>5</sup> Department of Medicine, University of Illinois at Chicago, Chicago, IL  
18 <sup>6</sup> Institute for Translational Genomics and Population Sciences and Department of Pediatrics, Los Angeles  
19 Biomedical Research Institute at Harbor-UCLA Medical Center, Torrance, CA  
20 <sup>7</sup> Department of Pediatrics, David Geffen School of Medicine at UCLA, Los Angeles, CA  
21 <sup>8</sup> Cardiovascular Health Research Unit, Division of Cardiology, Department of Medicine, University of  
22 Washington, Seattle, WA  
23 <sup>9</sup> Division of Genomic Medicine, National Human Genome Research Institute, National Institutes of  
24 Health, Bethesda, MD  
25 <sup>10</sup> Albert Einstein College of Medicine, Bronx, NY  
26 <sup>11</sup> Fred Hutchinson Cancer Research Center, Public Health Sciences Division, Seattle, WA  
27 <sup>12</sup> Departments of Medicine and Epidemiology Johns Hopkins University, Baltimore, MD  
28 <sup>13</sup> Center for Cardiovascular Research, John A. Burns School of Medicine, Honolulu, HI  
29 <sup>14</sup> UNC Eshelman School of Pharmacy, University of North Carolina at Chapel Hill, Chapel Hill, NC  
30 <sup>15</sup> Department of Biostatistics, Vanderbilt University, Nashville, TN  
31 <sup>16</sup> Department of Biomedical Data Science, Stanford University School of Medicine, Stanford, CA  
32 <sup>17</sup> Center for Genomic Health, Icahn School of Medicine at Mount Sinai, New York City, NY  
33 <sup>18</sup> Charles Bronfman Institute of Personalized Medicine, Icahn School of Medicine at Mount Sinai, New  
34 York City, NY  
35 <sup>19</sup> Department of Genetics and Genomic Sciences, Icahn School of Medicine at Mount Sinai, New York  
36 City, NY  
37 <sup>20</sup> Department of Medicine, Icahn School of Medicine at Mount Sinai, New York City, NY  
38 <sup>21</sup> Epidemiological Cardiology Research Center (EPICARE), Wake Forest School of Medicine, Winston-  
39 Salem, NC  
40 <sup>22</sup> Carolina Center for Genome Sciences, University of North Carolina at Chapel Hill, Chapel Hill NC

41  
42 \*Corresponding author; Antoine Baldassari, 123 W. Franklin Street, Building C, Suite 4210, Chapel Hill,  
43 NC, 27514, USA, [baldassa@email.unc.edu](mailto:baldassa@email.unc.edu)

44

45 **ABSTRACT**

46 **Background:** Published genome-wide association studies (GWAS) are mainly European-centric,  
47 examine a narrow view of phenotypic variation, and infrequently interrogate genetic effects shared across  
48 traits. We therefore examined the extent to which a multi-ethnic, combined trait GWAS of phenotypes  
49 that map to well-defined biology can enable detection and characterization of complex trait loci.

50 **Methods:** With 1000 Genomes Phase 3 imputed data in 34,668 participants (15% African American; 3%  
51 Chinese American; 51% European American; 30% Hispanic/Latino), we performed covariate-adjusted  
52 univariate GWAS of six contiguous electrocardiogram (ECG) traits that decomposed an average heartbeat  
53 and two commonly reported composite ECG traits that summed contiguous traits. Combined phenotype  
54 testing was performed using the adaptive sum of powered scores test (aSPU).

55 **Results:** We identified six novel and 87 known ECG trait loci (aSPU p-value < 5E-9). Lead SNP  
56 rs3211938 at novel locus CD36 was common in African Americans (minor allele frequency=10%) and  
57 near-monomorphic in European Americans, with effect sizes for the composite trait, QT interval, among  
58 the largest reported. Only one novel locus was detected for the composite traits, due to opposite directions  
59 of effects across contiguous traits that summed to near-zero. Combined phenotype testing did not detect  
60 novel loci unapparent by univariate testing. However, this approach aided locus characterization,  
61 particularly when loci harbored multiple independent signals that differed by trait.

62 **Conclusions:** Despite including one-third as few participants as the largest published GWAS of ECG  
63 traits, our study identifies multiple novel ECG genetic loci, emphasizing the importance of ancestral  
64 diversity and phenotype measurement in this era of ever-growing GWAS.

65 **AUTHOR SUMMARY**

66 We leveraged a multiethnic cohort with precise measures of cardioelectric function to identify novel  
67 genetic loci affecting this complex, multifaceted phenotype. The success of our approach stresses the  
68 importance of phenotypic precision and participant diversity for future locus discovery and  
69 characterization efforts, and cautions against compromises made in genome-wide association studies to  
70 pursue ever-growing sample sizes.

71

## 72 INTRODUCTION

73 Genetic susceptibility underlies a majority of common diseases and traits, shown by genome-wide  
74 association studies (GWAS) that have identified thousands of genetic loci for traits such as  
75 cardiovascular, cardiometabolic, cancer, kidney, psychiatric, ocular, inflammatory, and neuromuscular  
76 conditions(1). The many GWAS reports have revealed both common threads underlying the genetic  
77 architecture of complex diseases and traits, as well as research gaps. For example, evidence of shared  
78 genetic effects (i.e., pleiotropy) is widespread, even for traits with few known etiologic links(2,3). Yet  
79 few studies have systematically examined evidence of shared genetic effects, thereby missing  
80 opportunities to identify and characterize master regulators as strong candidates for intervention(2,4).  
81 There is also limited racial/ethnic diversity, inasmuch as the majority (>80%) of GWAS participants have  
82 been of European ancestry<sup>3</sup>. Limited diversity leads to a biased view of human variation that hinders  
83 translation of genetic associations into clinical and public health applications for all populations(5,6).  
84 Further, the scale and collaborative nature of current GWAS analyses prioritize traits that are widely  
85 available across studies, which may not precisely capture phenotypic variation and its underlying  
86 biology(7,8). Together, these research gaps argue for expanding GWAS analyses to systematically assess  
87 for shared genetic effects across a spectrum of biologically important traits in multi-ethnic populations.

88

89 Electrocardiograms (ECG) measure a sequence of distinct electrophysiologic processes in the  
90 myocardium that underlie cardiac conduction and repolarization. ECG traits have high heritability(9), are  
91 relevant to cardiovascular health,(10) and allow opportunities for dense phenotyping(11). Moreover, there  
92 are few racially/ethnically diverse GWAS reports on ECG traits(12). Therefore, ECG traits are well suited  
93 for assessing the degree to which increased racial/ethnic diversity, evaluation of genetic effects shared  
94 across phenotypes, and improved phenotype resolution can enhance locus identification and  
95 characterization. We therefore examined individual and shared genetic effects underlying six contiguous  
96 measures of the ECG waveform spanning an average heartbeat. Analyses used data from the multi-ethnic

97 Population Architecture using Genetic Epidemiology (PAGE) study and the Multi-Ethnic Study of  
98 Atherosclerosis (MESA). Our results illustrate the broad utility of multi-ethnic GWAS analyses of  
99 carefully constructed individual and aggregate traits to illuminate the biology of complex diseases and  
100 traits.

## 101 **RESULTS**

### 102 Sample description

103 Of the 39,538 participants with GWAS and ECG data in ARIC, HCHS/SOL, MESA, and WHI, 34,668  
104 (88%) met all inclusion criteria (Tables S1, S2). Seventy-five percent of eligible participants were female,  
105 the mean age was 55 years, and nearly half were either Hispanic/Latino (30%) or African American  
106 (15%) (Table S4). On average, participants were overweight (BMI mean = 29 kg/m<sup>2</sup>) and had high serum  
107 low-density lipoprotein cholesterol (mean = 135 mg/dL). There was a high prevalence of hypertension  
108 (49%). Holding all adjustment variables constant, P wave and TP segment durations were the most  
109 strongly correlated among the six ECG traits (partial correlation  $\rho=-0.65$ ), whereas T wave and P wave  
110 durations ( $\rho=0.01$ ) as well as QRS and PR durations ( $\rho=-0.02$ ) were largely uncorrelated (Table S5).

111

### 112 Overview of association results

113 Approximately 22M SNPs met our inclusion criteria and were used to assess for associations with the six  
114 contiguous and two composite ECG traits (Figures S1, S2). Lead SNPs at 82 of 149 loci (56%) previously  
115 reported by 26 interval scale ECG trait GWAS analyses (Table S6) were identified at genome-wide  
116 significance in our multi-ethnic population. The successful identification of previously recognized loci  
117 varied by trait (Table S7), ranging from 21 of 45 (47%) loci for QRS interval, to nine of 14 (64%) loci for  
118 P wave. When using a lower significance threshold of  $p_{\text{aSPU}} < 0.0003$  ( $0.05/149$ ), 123 of the 149 (83%)  
119 previously recognized interval scale ECG trait loci were identified.

120 An additional six loci were >500 kb away from all lead SNPs previously reported by interval scale ECG  
121 trait GWAS and are presented as novel (Table 1, **Figure 1**). As described below, our results highlight the  
122 utility of phenotype decomposition, ancestral diversity, and combined-phenotype testing for the  
123 identification and characterization of complex trait loci.

124 **Table 1.** Novel genome wide-significant ( $p_{\text{aSPU}} < 5 \times 10^{-9}$ ) loci discovered in genome-wide association study of six contiguous electrocardiographic  
 125 traits that decompose an average heartbeat in N=34,668 participants from the multi-ethnic Population Architectures using Genomics and  
 126 Epidemiology study and the Multi-Ethnic Study of Atherosclerosis

| Lead SNP    | Chr | Position  | Coded allele | Non-coded allele | Locus           | AA  | EA     | CHN    | HIS | Contiguous ECG traits                 |                                       |                                       |                    |                                       |                                       | Composite ECG trait                   |                    |
|-------------|-----|-----------|--------------|------------------|-----------------|-----|--------|--------|-----|---------------------------------------|---------------------------------------|---------------------------------------|--------------------|---------------------------------------|---------------------------------------|---------------------------------------|--------------------|
|             |     |           |              |                  |                 |     |        |        |     | P wave                                | PR segment                            | QRS interval                          | ST segment         | T wave                                | TP segment                            | QT interval                           | PR interval        |
| rs13143308  | 4   | 111714419 | T            | G                | <i>PITX2</i>    | 30% | 21%    | 74%    | 39% | <b><math>2 \times 10^{-11}</math></b> | $5 \times 10^{-4}$                    | $2 \times 10^{-1}$                    | $3 \times 10^{-2}$ | $3 \times 10^{-1}$                    | $1 \times 10^{-1}$                    | $4 \times 10^{-1}$                    | $8 \times 10^{-1}$ |
| rs4340921   | 5   | 49687697  | C            | T                | <i>EMB</i>      | 66% | 46%    | 49%    | 44% | <b><math>8 \times 10^{-13}</math></b> | $8 \times 10^{-1}$                    | $1 \times 10^{-3}$                    | $7 \times 10^{-1}$ | $2 \times 10^{-1}$                    | $2 \times 10^{-4}$                    | $7 \times 10^{-1}$                    | $2 \times 10^{-3}$ |
| rs3211938   | 7   | 80300449  | G            | T                | <i>CD36</i>     | 10% | <0.01% | <0.01% | 1%  | $2 \times 10^{-5}$                    | $8 \times 10^{-3}$                    | $5 \times 10^{-3}$                    | $4 \times 10^{-1}$ | $1 \times 10^{-5}$                    | <b><math>1 \times 10^{-13}</math></b> | <b><math>6 \times 10^{-10}</math></b> | $6 \times 10^{-6}$ |
| rs11073663  | 15  | 85260268  | A            | G                | <i>ZNF592</i>   | 27% | 54%    | 19%    | 48% | $4 \times 10^{-1}$                    | <b><math>3 \times 10^{-10}</math></b> | $5 \times 10^{-1}$                    | $4 \times 10^{-1}$ | $2 \times 10^{-3}$                    | $7 \times 10^{-3}$                    | $2 \times 10^{-2}$                    | $6 \times 10^{-7}$ |
| rs142166837 | 17  | 57471022  | C            | T                | <i>YPEL2</i>    | 31% | 52%    | 32%    | 49% | $5 \times 10^{-2}$                    | $6 \times 10^{-1}$                    | $1 \times 10^{-3}$                    | $1 \times 10^{-1}$ | <b><math>4 \times 10^{-11}</math></b> | $1 \times 10^{-2}$                    | $4 \times 10^{-7}$                    | $8 \times 10^{-1}$ |
| rs13047360  | 21  | 28851580  | G            | A                | <i>BC043580</i> | 7%  | 17%    | 23%    | 16% | $7 \times 10^{-1}$                    | $3 \times 10^{-2}$                    | <b><math>2 \times 10^{-11}</math></b> | $2 \times 10^{-1}$ | $5 \times 10^{-2}$                    | $1 \times 10^0$                       | $2 \times 10^{-1}$                    | $3 \times 10^{-2}$ |

127  
 128 aSPU: adaptive sum of powered tests  
 129 AA: African American, CHN: Chinese-American, EA: European-American, HIS: Hispanic/Latinos  
 130 Bolded values exceed the genome-wide significance threshold ( $p < 5 \times 10^{-9}$ )





138 Phenotype decomposition

139 Of the six novel loci identified for the contiguous traits, two loci were identified for P wave and one locus  
140 each was identified for PR segment, QRS interval, T wave, and TP segment. None of the novel loci were  
141 associated with ST segment or affected multiple contiguous ECG traits at genome-wide significance  
142 levels.

143

144 We then contrasted results for the six contiguous ECG traits with results from the two composite ECG  
145 traits, QT interval (QRS interval + ST segment + T wave) and PR interval (P wave + PR segment) (Figure  
146 2). *CD36* was the only novel locus identified for both a contiguous (TP segment) and a composite (QT  
147 interval) ECG trait (Table 1). We also examined evidence of consistency of SNP effects by grouping  
148 traits according to whether they affected atrial (PR interval, PR segment, and P wave) or ventricular (QT  
149 interval, QRS interval, T wave, and ST segment) conduction. For atrial traits, novel loci identified for the  
150 contiguous traits had varying directions of effects (Figure 2a, Table S9), which when combined resulted  
151 in near-zero estimated effects for the composite trait. For example, every copy of the T allele for *PITX2*  
152 lead SNP rs13143308 increased P wave duration by 0.63 milliseconds [ms] ( $p_{\text{univariate}}=2 \times 10^{-11}$ ), but  
153 shortened the PR segment by 0.58 ms ( $p_{\text{univariate}}=6 \times 10^{-4}$ ). However, when evaluated together as the  
154 composite trait PR interval, every copy of the rs13143308 T allele prolonged the PR interval by 0.03 ms  
155 ( $p_{\text{univariate}}=0.84$ ). Similarly, among the 59 loci associated with ventricular conduction, two of the three  
156 novel loci (rs142166837 and rs13047360) had opposite effects on QRS interval and T wave duration,  
157 which did not reach genome-wide significance when summed for the composite trait QT interval (Figure  
158 2, Table S9). There were no instances of either PR or QT interval identifying a novel locus not associated  
159 with any of the six contiguous traits at the genome-wide level.

160

161 **Figure 2. Lead SNPs at all loci significantly ( $P_{\text{asPU}} < 5 \times 10^{-9}$ ) associated with (a) atrial and (b)**  
 162 **ventricular conduction measures, in  $n=34,668$  multi-ethnic Population Architecture Using**  
 163 **Genomics in Epidemiology (PAGE) Study and Multi-Ethnic Study of Atherosclerosis participants.**  
 164 Outer stars denote novel loci; blue and red shading signifies opposite directions of effect, relative to PR  
 165 interval and QT interval. To aid interpretation, lead SNPs were organized into broadly similar groups  
 166 using hierarchical cluster analysis.

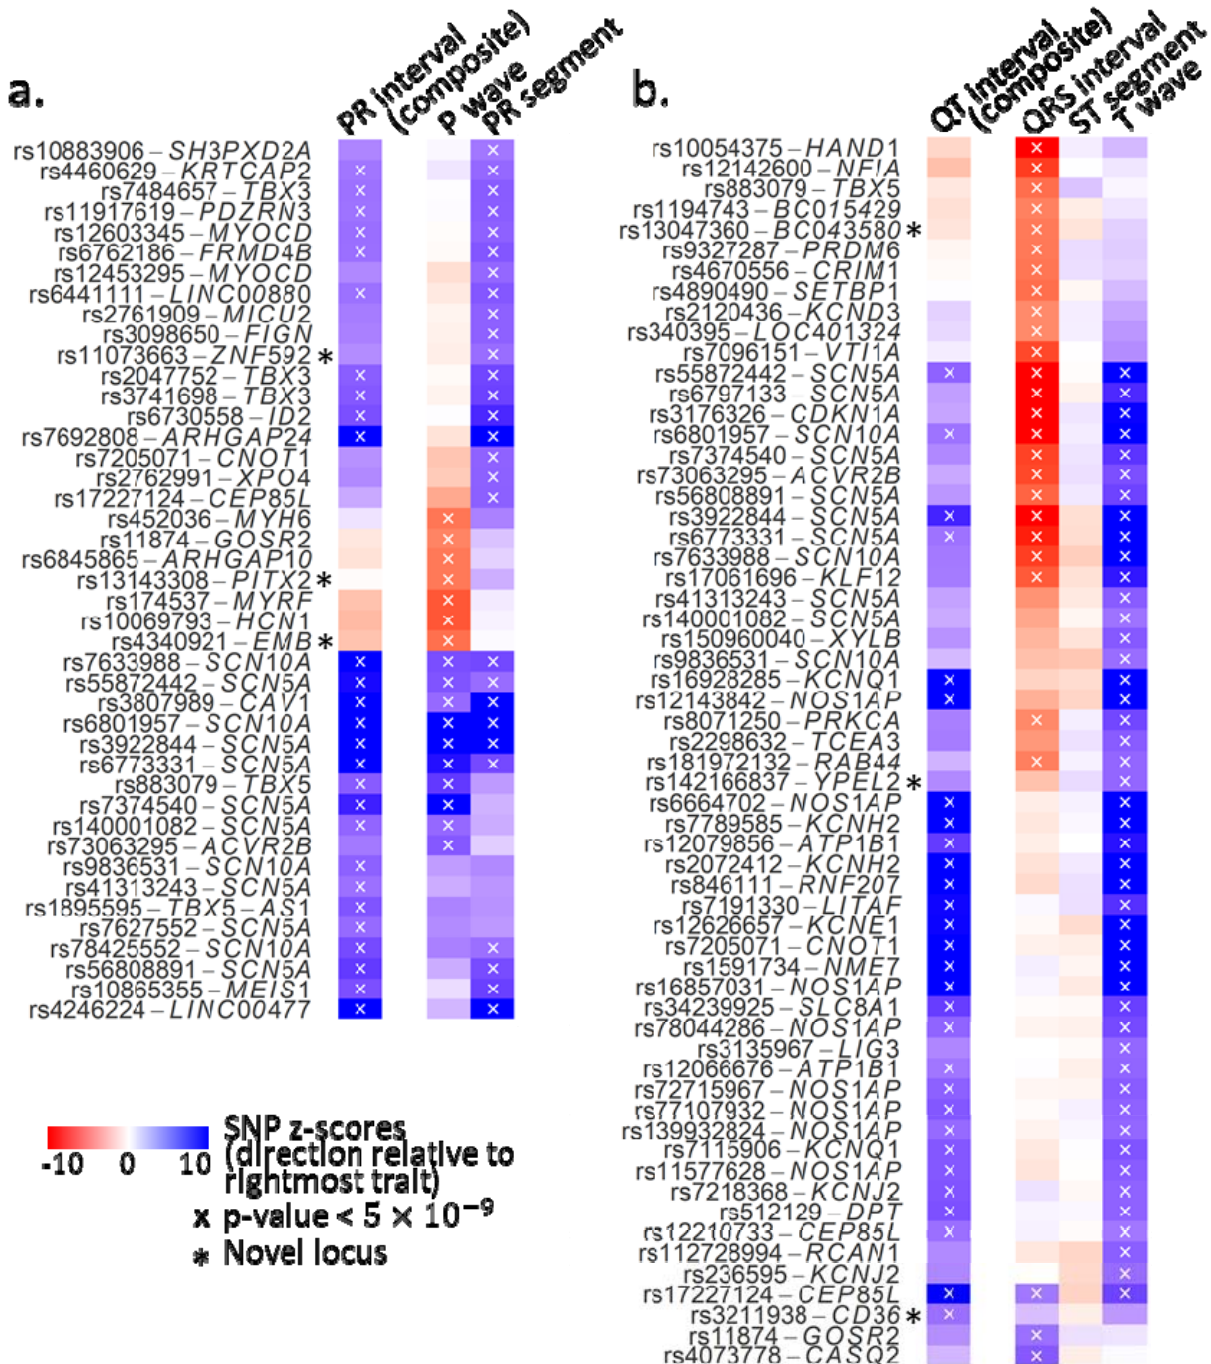

168 Ancestral diversity

169 Lead SNPs at five of the six novel loci were common (MAF >5%) across ancestral populations, with little  
170 evidence of heterogeneity of effect across race/ethnicity (Table S8). One locus (*CD36*) showed evidence  
171 of population specificity, with lead SNP rs3211938 near-monomorphic in European and Chinese  
172 populations (MAF<0.01%), infrequent in Hispanic/Latinos (MAF=1%), and common in African  
173 Americans (MAF=10%). Variant rs3211938 showed genome-wide significant associations with TP  
174 segment ( $p_{\text{univariate}}=1\times 10^{-13}$ ) and QT interval ( $p_{\text{univariate}}=6\times 10^{-10}$ ) and nominal associations with P wave  
175 ( $p_{\text{univariate}}=2\times 10^{-5}$ ), PR segment ( $p_{\text{univariate}}=0.008$ ), and QRS interval ( $p_{\text{univariate}}=0.005$ ). Although no GWAS  
176 of TP segment has been published, each copy of the rs3211938 G allele increased QT interval by 3.70 ms.  
177 Reported effects for common (MAF>5%) QT lead SNPs range from 0.5 ms to 3.5 ms(13). SNP  
178 rs3211938 was either genotyped or well-imputed across studies and ancestry groups (imputation quality >  
179 0.89, Table S10).

180

181 Combined phenotype analyses

182 We found widespread evidence of shared genetic effects across ECG traits. One fourth of lead SNPs  
183 identified as genome-wide significant ( $P_{\text{aspu}}<5\times 10^{-9}$ ) had univariate associations with at least two ECG  
184 traits ( $p_{\text{Univariate}}<5\times 10^{-9}$ ). Lead SNPs at *ACVR2B*, *SCN5A*, *SCN10A*, *CEP85L*, *CAVI*, and *TBX5* were  
185 associated with three or more ECG traits at univariate genome-wide significance levels. As expected,  
186 traits that were more highly correlated also showed stronger evidence of shared genetic effects, with 10 of  
187 the 20 lead SNPs that were associated with PR segment also showing genome-wide associations with TP  
188 segment. However, evidence of shared genetic effects among uncorrelated traits was also observed. For  
189 example, eight genome-wide significant SNPs at *SCN5A*, *SCN10A*, *CEP85L*, and *CNOT1* exhibited  
190 significant univariate associations with both the T wave and P wave, despite low correlation between the  
191 two traits ( $\rho = 0.02$ ).

192

193 There also was evidence of allelic heterogeneity for multiple ECG traits. As an example, five signals in  
194 low LD ( $r^2 < 0.1$ ) were detected within a 500 kb region near the previously identified locus *TBX5*, each  
195 associated with a distinct combination of ECG traits. Two of the five independent signals (rs3741698 and  
196 rs2047752) were largely specific to PR segment (**Figure 3**). The other three signals involved PR segment  
197 and QRS interval (lead SNP rs4784657), P wave, QRS interval, and TP segment (lead SNP rs883079),  
198 and the combined phenotype only (lead SNP rs1895595). Lead SNPs also showed some evidence of  
199 variation across traits, including the locus identified by lead SNP rs7484657, for which p-values for the  
200 QRS interval lead SNP differed by approximately three orders of magnitude from the rs7484657 p-value.

201 **Figure 3. Regional SNP associations and linkage disequilibrium at four independent signals near *TBX5* among 34,668 participants with**  
 202 **electrocardiographic data in the Population Architectures using Genomics and Epidemiology (PAGE) study and Multi-Ethnic Study of**  
 203 **Atherosclerosis. Lighter colors indicate greater linkage disequilibrium with lead SNPs, and black markers denote SNPs not in LD ( $r^2 < 0.1$ ) with**  
 204 **any of the four lead SNPs. Combined phenotype p-values are truncated at  $1 \times 10^{-11}$ .**

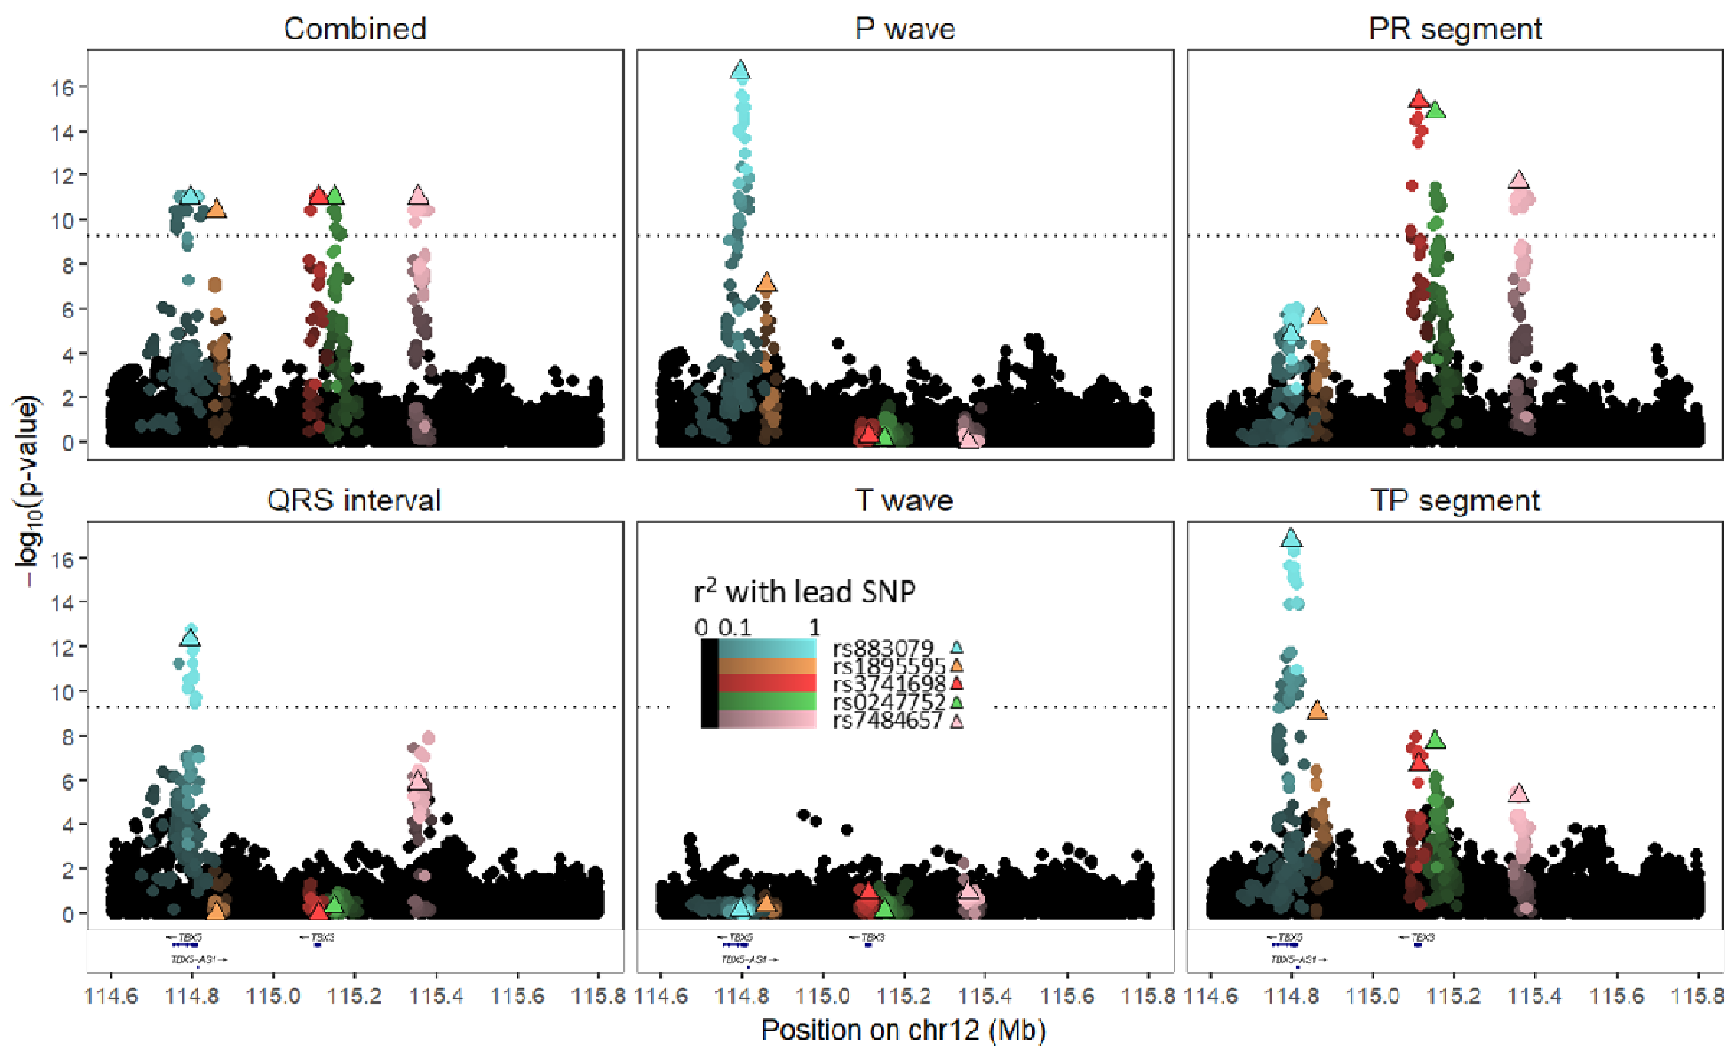

205

## 206 **DISCUSSION**

207 Using cardiac conduction and repolarization traits as an example, we examined the extent to which  
208 combined multi-ethnic GWAS analyses of carefully selected phenotypes that map to well-defined biology  
209 improved detection and characterization of loci. We identified six novel loci, five of which were detected  
210 only when examining the more precisely defined phenotypes, and a sixth locus that was specific to  
211 African ancestral populations. We also showed how leveraging evidence of a shared genetic architecture  
212 aided the characterization of known loci, particularly when loci harbored multiple independent signals  
213 that differed by trait. In this mega-GWAS era involving predominantly European ancestral populations,  
214 this study, conducted in a population one-third the size of the largest published ECG trait GWAS (13,14),  
215 underscores the merits of prioritizing diversity and phenotype measurement.

216

217 Of the three GWAS challenges we examined, our deliberate selection of phenotype measures mapping to  
218 well-defined biology largely drove locus discovery, challenging current trends in GWAS that emphasize  
219 increased sample size. The growing scale of GWAS, which today can surpass one million  
220 participants(15), has resulted in the prioritization of commonly available traits (e.g., body mass index)  
221 over traits that more precisely capture underlying biology (e.g., direct measures of body fat(16)). In our  
222 case, composite ECG traits PR interval and QT interval have been most commonly interrogated by  
223 GWAS. However, these traits represent aggregates of physiologically distinct mechanisms, which may  
224 obscure loci with effects localized to, or inconsistent across, individual contiguous traits. This  
225 phenomenon was illustrated by the *PITX2* locus, a locus associated with atrial fibrillation.(17) Because  
226 *PITX2* lead SNP rs13143308 had opposing associations with the contiguous P wave and PR segment, a  
227 standard approach using the composite PR interval yielded a near-zero effect, obscuring the potential  
228 importance of the locus on atrial function regardless of sample size. These results emphasize the need to  
229 balance ongoing investments in large-scale genome measurement with use of precision phenotyping, for  
230 instance through efforts like the ongoing Precision Medicine Initiative's *All of Us* Research Program(18).

231

232 The six traits we used in our ECG decomposition were motivated by their relations to physiology, and  
233 their coherence as an aggregate electrophysiologic phenotype. While an important complement to  
234 traditional, coarser measures like the PR and QT intervals, our phenotype decomposition approach that  
235 identified novel loci and improved characterization of known loci captured but a fraction of the full  
236 variation in ECG phenotypes; further phenotypic specificity and additional biologic insight may be  
237 offered by GWAS of other ECG traits, including measures of waveform amplitudes, angles, or variability.  
238 A complementary approach might select traits that are governed by a shared genetic architecture, such as  
239 ion channel function or cardiac remodeling when applied to ECG trait GWAS, potentially assisting efforts  
240 to map loci to specific biologic pathways. Further extending combined phenotype ECG trait GWAS to  
241 include other phenotypes and traits (e.g. cardiometabolic traits or cardiovascular diseases) also is  
242 warranted, given evidence that these traits represent interrelated manifestations of common biologic  
243 mechanisms (12) as well as success of prior combined phenotype studies to disentangle complex  
244 biology(19). Overall, the question of how to select intermediate traits and integrate such traits with other  
245 phenotypic data, including clinical and prognostic information, remains an open question, with best  
246 practices that likely will vary across complex traits.

247

248 Despite mounting interest in combined phenotype statistical approaches, their merits for novel locus  
249 discovery and locus characterization remain largely untested. Here, combined phenotype analysis of  
250 contiguous ECG traits did not identify novel loci that eluded traditional univariate analyses, despite the  
251 purported ability of combined phenotype methods to increase statistical power. However, preliminary  
252 evaluation of *TBX5*, a locus harboring multiple independent signals, suggested that combined phenotype  
253 approaches may be particularly informative for fine-mapping. Supporting the extension of combined  
254 phenotype methods to fine-mapping are methods that have been specifically developed for this  
255 challenge(20), including fastPAINTOR. When compared with single trait fine-mapping, fastPAINTOR

256 reduced the number of SNPs required for follow-up in order to capture 90% of the causal variants, from  
257 23 SNPs per locus using a single trait to 12 SNPs when fine-mapping two traits simultaneously. Other  
258 potentially fruitful avenues may extend combined-phenotype studies of ECG traits to include  
259 cardiovascular disease.

260

261 The lack of diversity in GWAS has long been described(21), but the literature remains dominated by  
262 studies on European ancestral populations. As a result, genomics research is confined to a narrow sliver of  
263 human genetic diversity, even as the US population becomes more diverse(22). Our deliberate selection  
264 of an ancestrally diverse population enabled the identification of a novel *CD36* locus, which was common  
265 only in populations of African descent. Lead SNP, rs3211938, had a large effect on QT interval, among  
266 the largest effects reported to-date,(13) although winner's curse may be a concern(13). Variant  
267 rs3211938, a ClinVar-indexed missense mutation known to cause *CD36* deficiency, encodes a scavenger  
268 receptor central to formation and cellular uptake of long-chain fatty acids. Although *CD36* and rs3211938  
269 have been associated with a spectrum of cardiometabolic phenotypes,(23–30) the most intriguing finding  
270 is the potential linkage with sudden cardiac arrest (SCA), for which QT interval prolongation increases  
271 risk(31). SCA accounts for approximately 10-20% of total mortality in industrial countries(32), and  
272 several decades of research have suggested a contributory role of impaired fatty-acid uptake in  
273 cardiomyocytes. Although genetic studies of *CD36* and SCA were largely null(33,34), the use of  
274 predominantly European ancestral populations constrained evaluation of rs3211938, which is near  
275 monomorphic in all populations except those of African descent. Overall, these results highlight the  
276 potential for racially/ethnically diverse studies to provide novel biological insights, beyond the reach of  
277 predominantly European ancestral populations.

278 Limitations of our study point to several promising directions for future work. First, we lacked a  
279 replication cohort, reflecting the rarity of multi-ethnic studies with high-resolution ECGs from which to  
280 derive the six contiguous ECG traits. However, this study is the largest multi-ethnic GWAS of ECGs to-



281 date, with excellent statistical power, and we identified loci that are biologically plausible. Second, we  
282 limited our evaluation to common variants, although previous studies have demonstrated the utility of  
283 interrogating rare variants, particularly in the context of multi-ethnic studies(35,36). Our focus on  
284 common variants reflects the current limitations of combined phenotype methods for interrogating rare  
285 variants in complex samples or with summary data. Widespread interest in this approach suggests that  
286 this gap may be closed soon. Further, while this study helps address the lack of diversity in ECG trait  
287 GWAS, the small number of Chinese American participants limited our ability identify loci that were  
288 common only in populations of East Asian descent. Future efforts that further expand population  
289 racial/ethnic diversity represents an important next both for cardiac conduction studies and GWAS more  
290 broadly. Finally, we did not perform in-depth fine-mapping, although approaches that leverage multiple  
291 phenotypes have been described(20). Identification of allelic heterogeneity provides a clear impetus for  
292 future studies that leverage evidence of a shared genetic effects to disentangle the genetic architecture  
293 underlying ECG traits and, more broadly, complex traits.

294

295 This study illustrates three strategies to improve the efficiency of locus discovery. Of these, our findings  
296 emphasize the importance of carefully constructed phenotypes and of ancestral diversity for novel locus  
297 identification. In contrast, combined phenotype methods did not enable identification of novel loci  
298 unapparent using traditional approaches, although combined phenotype studies did inform  
299 characterization of known loci. As researchers contemplate the next generation of genomics studies,  
300 increased phenotype resolution and ancestral diversity will be crucial to understanding the ever-expanding  
301 “phenome,” while ensuring equitable access to precision medicine.

## 302 MATERIAL AND METHODS

### 303 Study population

#### 304 *Data sources*

305 The multi-ethnic PAGE study(6) is a consortium funded by the National Human Genome Research  
306 Institute (NHGRI) to examine the genetic underpinnings of common complex diseases and traits in  
307 ancestrally-diverse populations (online supplement). PAGE data used in this study included African  
308 American, European American, and Hispanic/Latino participants enrolled in the Women's Health  
309 Initiative (WHI)(37) Clinical Trial, and in the population-based Atherosclerosis Risk in Communities  
310 Study (ARIC)(38), and Hispanic Community Health Study/Study of Latinos (HCHS/SOL)(39). Data for  
311 African American, Chinese American, European American, and Hispanic/Latino populations also were  
312 contributed by the population-based Multi-Ethnic Study of Atherosclerosis (MESA)(40) (online  
313 supplement).

314

### 315 Electrocardiography

316 Ten-second, resting, standard 12-lead ECGs were collected following standard protocols (online  
317 supplement). To enable direct comparison with the published literature, we used exclusion criteria from  
318 published GWAS of QT interval, QRS duration, PR interval, and P wave. Poor-quality ECGs and ECGs  
319 exhibiting severe abnormalities were excluded (Table S1, S2). Also excluded were participants with  
320 prevalent heart failure or coronary heart disease, and participants taking any class I or III anti-arrhythmic  
321 medication.

322

323 We temporally decomposed the ECG waveform into six contiguous ECG traits, each reflecting distinct  
324 physiological processes: P wave, PR segment, QRS interval, ST segment, T wave, and TP segment  
325 (Figure 4). Three of the six contiguous traits were measured directly from maximum readings across all

326 12 ECG leads (P wave, QRS interval, T wave), and were used to construct the remaining three traits, as  
327 detailed in supplementary material. We also evaluated two composite ECG traits that are widely available  
328 and have been examined in numerous GWAS analyses: the QT interval(13) and the PR interval(14). The  
329 PR interval combines the contiguous P wave and PR segment, reflecting conduction through the atria and  
330 the AV-node. The QT interval spans the contiguous QRS interval, ST segment, and the T wave,  
331 representing ventricular activity.

332

333 Figure 4. Illustration of the six contiguous (P wave, PR segment, QRS interval, ST segment, and TP  
334 segment) and two composite (QT interval and PR interval) ECG traits.

### Traditional composite traits

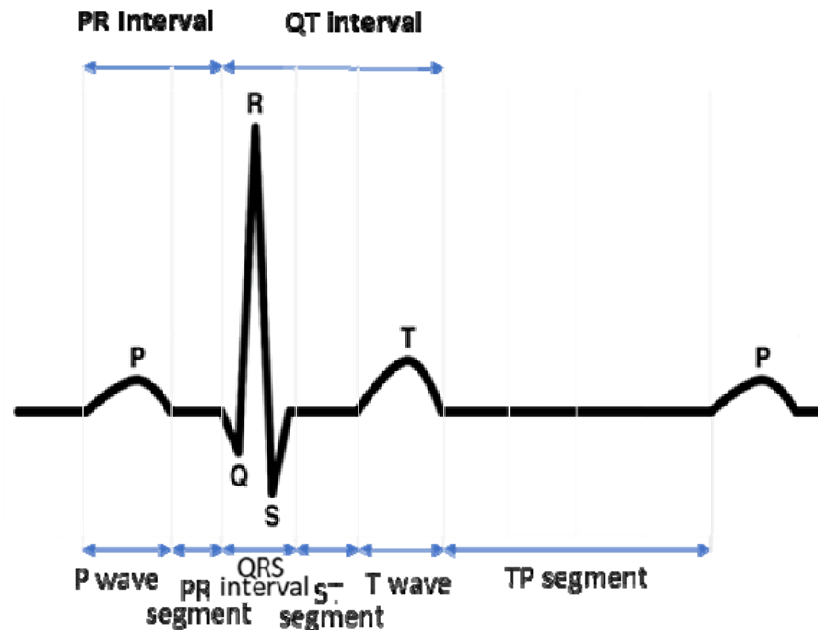

### 6 Contiguous traits

335

336 Genotyping and Imputation

337 Imputation was performed across studies, using the 1000 Genomes Project phase 3 reference panel (Table  
338 S3). In addition to study-specific quality control protocols, we excluded SNPs meeting any of the  
339 following criteria: minor allele frequency (MAF) <1%; imputation quality score < 0.3; or effective sample  
340 size < 30, calculated as  $2 \times MAF(1 - MAF) \times N \times Q$ , where  $Q$  is imputation quality and  $N$  is study size.

341

342 Statistical Methods

343 *Overview*

344 Statistical analyses were carried out in two stages. First, genome-wide univariate associations for each of  
345 six contiguous ECG traits were calculated in twelve substudies defined by genotyping platform,  
346 race/ethnicity, and study (Table S3). The pooled PAGE sample of Hispanic/Latino and African American  
347 participants from the HCHS/SOL and WHI genotyped together(41) on the Multi-Ethnic Genotyping  
348 Array (MEGA) array was retained as a single substudy. The remaining 11 substudies were defined by  
349 ancestry (African American, Chinese American, and European American) and study (ARIC, MESA, and  
350 WHI). Substudy-specific univariate results for the six contiguous ECG traits were then combined via  
351 trait-specific inverse-variance meta-analysis(42). Next, meta-analyzed contiguous ECG trait-specific  
352 univariate associations were evaluated in aggregate using the adaptive sum of powered scores method(43)  
353 (aSPU, described below), yielding a combined-trait p-value for each SNP. All univariate and combined-  
354 phenotype analyses were performed in the multi-ethnic population as demonstrated previously in the  
355 PAGE study(44), and, in sensitivity analyses, by self-identified race/ethnicity.

356

357

358 *Univariate associations*

359 Univariate associations for the six contiguous ECG traits and the two composite ECG traits were  
360 estimated assuming an additive genetic model of inheritance and adjusting for linear effects of age at  
361 study exam, sex, study site or region, inverse heart rate, and ancestral principal components(45). The  
362 pooled PAGE sample was analyzed using generalized estimating equations allowing correlated errors  
363 among households sharing first or second-degree relatives, and independent error distributions  
364 by self-reported ancestry group(46). Linear regression was used for the other 11 analytic groups.  
365 Models were implemented using SUGEN (46) (ARIC, pooled PAGE sample, WHI) and SNPTest  
366 (MESA). For each continuous and composite ECG trait, results were combined across substudies using  
367 inverse-variance weighted, genomic inflation-corrected meta-analysis(42). SNP effect heterogeneity  
368 across substudies and, in sensitivity analyses, among self-reported race/ethnicity was measured with the  
369 Cochran's Q test. For each ECG trait, SNP meta-analysis p-values were assessed by calculating genomic  
370 inflation factors ( $\lambda$ ) and plotting the expected distribution against observed results.

371

372 *Combined phenotype analyses*

373 To evaluate evidence of shared genetic effects across all six contiguous ECG traits, meta-analyzed  
374 univariate results were combined with aSPU(43). The aSPU procedure was selected based on its  
375 accommodation of effect direction across traits, low type I error rate in simulation studies when compared  
376 with other available procedures (data not shown), and its scalability to 1000 genomes imputed data. We  
377 implemented aSPU using Julia 1.0 to optimize efficiency, and made the code freely available as a Julia  
378 package (<https://github.com/kaskarn/JaSPU>).

379

380 aSPU uses meta-analyzed univariate summary z-scores, calculated for each SNP across all  $k$  traits.  
381 Briefly, the procedure estimates  $\Sigma$ , the  $k \times k$  correlation of null z-scores across univariate results and  
382 draws  $10^{11}$  Monte-Carlo samples from the multivariate  $N_k(0, \Sigma)$  distribution. For each SNP  $j$ , the results  
383 for all  $k$  traits  $z_{j1}, z_{j2}, \dots, z_{jk}$  are used to form the sequence of powered scores:  $SPU(\gamma) = z_1^\gamma + z_2^\gamma +$   
384  $\dots + z_k^\gamma$ , where  $\gamma = 0, 1, \dots, 8, \infty$ . This sequence is compared to values produced by all  $10^{11}$  draws from  
385 the simulated null distribution, and a Monte-Carlo p-value is derived for the best-powered  $SPU(\gamma)$  to  
386 calculate an overall SNP- p-value ( $p_{aSPU}$ ), ranging between  $1/(1+10^{11})$  and 1. The test is adaptive in the  
387 sense that the  $\gamma$  yielding the maximal  $SPU(\gamma)$  can vary across SNPs, so that the test maintains power  
388 against a number of different alternative hypotheses.

389

## 390 Reporting

391 Multi-ethnic combined phenotype results were presented as the primary findings, employing Bonferroni  
392 correction assuming 10M SNP tests (i.e.  $p_{aSPU} < 5 \times 10^{-9}$ ). Ancestry-specific and ECG-trait specific analyses  
393 were performed to aid interpretation of results and are considered sensitivity analyses.

394

395 Previously-reported SNPs were identified through review of the NHGRI-EBI GWAS Catalog(12) as of  
396 January 22, 2019 (Table S6), for the following interval scale ECG phenotypes: PR interval, PR segment,  
397 QRS interval, P wave, QT interval, and T wave, supplemented by a literature review to identify  
398 publications not indexed by the NHGRI-EBI GWAS Catalog(14,44,47). There were no published GWAS  
399 analyses of ST segment or TP segment durations.

400

401 We defined a locus to encompass all SNPs within 500 kb of, and in linkage-disequilibrium (LD) with, the  
402 lead SNP (multi-ethnic  $r^2 > 0.2$  in the unrelated PAGE study participants). SNPs > 500 kb away from all  
403 previously reported ECG trait loci were considered novel. Locus-specific lead SNPs were identified as the  
404 SNP with the lowest  $p_{\text{aSPU}}$ . Tied lowest  $p_{\text{aSPU}}$  were resolved using the lowest locus-specific univariate p-  
405 value across contiguous ECG traits. Complete summary level results from all analyses are made available  
406 through dbGaP (phs000356).

407

#### 408 Ethics Statement

409 All data were analyzed anonymously, and this study was exempted from review under 45 CFR 46.101(b)  
410 by the University of North Carolina institutional review board (IRB #18-1764).

## 411 SUPPORTING INFORMATION

412 Supporting material and methods, tables (S1-9), and figures (S1-2) are included in two additional files

413 **Figure S1. Quantile-Quantile plots for trans-ancestry meta-analyzed associations of SNPs with each**  
414 **of six ECG traits (decomposed ECG phenotype)** in n=34,668 participants from the Population  
415 Architectures using Genomics and Epidemiology (PAGE) study and the Multi-Ethnic Study of  
416 Atherosclerosis (MESA). Black markers and lambda values represent to p-values for all SNPs that passed  
417 quality control. Blue markers represent the subset of SNPs >500kb from any previously-reported ECG  
418 lead SNP.

419 **Figure S2 Manhattan plots for univariate, trans-ethnic ECG trait GWAS** in 34,668 participants from  
420 the Population Architectures using Genomics and the and Multi-Ethnic Study of Atherosclerosis  
421 (MESA).. Genome-wide ( $p_{\text{univariate}} < 5 \times 10^{-9}$ ) significant loci within 500kb of previously-reported ECG  
422 GWAS results are shown in yellow; genome-wide ( $p_{\text{univariate}} < 5 \times 10^{-9}$ ) significant loci >500 kb from  
423 previously reported ECG loci are shown in blue.

424

425 **Table S1.** Exclusion criteria for genome-wide study of all evaluated electrocardiographic traits.

426 **Table S2.** Participant exclusions (cumulative), by study and ancestry group

427 **Table S3.** Genotyping, imputation, and quality control by participating study

428 **Table S4. Participant characteristics by study of origin, and ancestry group,** among N=34,668  
429 participants from the Population Architecture using Genomics and Epidemiology (PAGE) study and the  
430 Multiethnic Study of Atherosclerosis (MESA).

431

432 **Table S5. Partial correlations between six contiguous traits decomposing the ECG,** in n=10,618  
433 eligible Hispanic Community Health Study/Study of Latinos participants. Partial correlations were  
434 adjusted for RR interval, gender, study site, and ancestry principal components.

435

436 **Table S6. Published genome-wide association studies of electrocardiographic traits,** indexed on the NHGRI  
437 GWAS catalog (Sept. 30, 2018).

438

439 **Table S7. Previously-reported associations of SNPs with temporal electrocardiographic traits,** and  
440 corresponding results in N=34,668 participants in the Population Architecture using Genomics and  
441 Epidemiology (PAGE) study and the Multiethnic Study of Atherosclerosis (MESA).

442 **Table S8 Trait-specific direction of effects, and meta-analysis heterogeneity p-values for univariate**  
443 **associations ( $p_{\text{univariate}} < 5 \times 10^{-9}$ ) of loci discovered in combined-phenotype analyses of six**  
444 **electrocardiographic traits ( $paSPU < 5 \times 10^{-9}$ ),** in 34,668 participations from the Population  
445 Architecture using Genomics and Epidemiology study (PAGE) and Multi-Ethnic Study of Atherosclerosis  
446 (MESA).

447



448 **Table S9 Trait-specific trans-ethnic meta-analyzed effect estimates and standard errors for**  
449 **univariate associations (punivariate  $< 5 \times 10^{-9}$ ) of loci discovered in combined-phenotype analyses of**  
450 **six electrocardiographic traits (paSPU  $< 5 \times 10^{-9}$ ), in 34,668 participations from the Population**  
451 **Architecture using Genomics and Epidemiology study (PAGE) and the Multi-Ethnic Study of**  
452 **Atherosclerosis (MESA).**

453  
454 **Table S10** Imputation quality scores of all novel variants reported in this study.

455 **ACKNOWLEDGMENTS**

456 The contents of this paper are solely the responsibility of the authors and do not necessarily represent the  
457 official views of the National Institutes of Health.

458 The PAGE consortium thanks the staff and participants of all PAGE studies for their important  
459 contributions. The complete list of PAGE members can be found at <http://www.pagestudy.org>.

460 The Stanford Global Reference Panel was created by Stanford - contributed samples and comprises  
461 multiple datasets from multiple researchers across the world designed to provide a resource for any  
462 researchers interested in diverse population data on the Multi-Ethnic Global Array (MEGA). The authors  
463 thank the researchers and research participants who made this dataset available to the community.

464 The authors thank the WHI investigators and staff for their dedication, and the study participants for  
465 making the program possible. A full listing of WHI investigators can be found  
466 at: [http://www.whiscience.org/publications/WHI\\_investigators\\_shortlist.pdf](http://www.whiscience.org/publications/WHI_investigators_shortlist.pdf).

467 The authors thank the staff and participants of the ARIC study for their important contributions. More  
468 detail about the ARIC study may be found at: <https://sites.csc.unc.edu/aric/>.

469 Genotyping for MESA was performed at Affymetrix (Santa Clara, California, USA) and the Broad  
470 Institute of Harvard and MIT (Boston, Massachusetts, USA) using the Affymetrix Genome-Wide Human  
471 SNP Array 6.0. We also thank the other investigators, the staff and the participants of MESA for their  
472 valuable contributions. A full list of participating MESA investigators and institutions can be found  
473 online (<http://www.mesa-nhlbi.org>).

474

475 **REFERENCES**

- 476 1. Visscher PM, Wray NR, Zhang Q, Sklar P, McCarthy MI, Brown MA, et al. 10 Years of GWAS  
477 Discovery: Biology, Function, and Translation. *The American Journal of Human Genetics*. 2017  
478 Jul;101(1):5–22.
- 479 2. LeBlanc M, Zuber V, Andreassen BK, Witoelar A, Zeng L, Bettella F, et al. Identifying Novel Gene  
480 Variants in Coronary Artery Disease and Shared Genes With Several Cardiovascular Risk Factors.  
481 *Circ Res*. 2016 Jan 8;118(1):83–94.
- 482 3. Kanai M, Akiyama M, Takahashi A, Matoba N, Momozawa Y, Ikeda M, et al. Genetic analysis of  
483 quantitative traits in the Japanese population links cell types to complex human diseases. *Nat*  
484 *Genet*. 2018 Mar;50(3):390–400.
- 485 4. Price AL, Spencer CCA, Donnelly P. Progress and promise in understanding the genetic basis of  
486 common diseases. *Proc Biol Sci*. 2015 Dec 22;282(1821):20151684.
- 487 5. Popejoy AB, Fullerton SM. Genomics is failing on diversity. *Nature*. 2016 13;538(7624):161–4.

- 488 6. Matisse TC, Ambite JL, Buyske S, Carlson CS, Cole SA, Crawford DC, et al. The Next PAGE in  
489 Understanding Complex Traits: Design for the Analysis of Population Architecture Using Genetics  
490 and Epidemiology (PAGE) Study. *Am J Epidemiol*. 2011 Oct 1;174(7):849–59.
- 491 7. Goddard ME, Kemper KE, MacLeod IM, Chamberlain AJ, Hayes BJ. Genetics of complex traits:  
492 prediction of phenotype, identification of causal polymorphisms and genetic architecture. *Proc Biol*  
493 *Sci* [Internet]. 2016 Jul 27 [cited 2018 Oct 1];283(1835). Available from:  
494 <https://www.ncbi.nlm.nih.gov/pmc/articles/PMC4971198/>
- 495 8. Timpson NJ, Greenwood CMT, Soranzo N, Lawson DJ, Richards JB. Genetic architecture: the shape  
496 of the genetic contribution to human traits and disease. *Nature Reviews Genetics*. 2018  
497 Feb;19(2):110–24.
- 498 9. Silva CT, Kors JA, Amin N, Dehghan A, Witteman JCM, Willemssen R, et al. Heritabilities, proportions  
499 of heritabilities explained by GWAS findings, and implications of cross-phenotype effects on PR  
500 interval. *Hum Genet*. 2015 Nov 1;134(11–12):1211–9.
- 501 10. Food and Drug Administration, HHS. International Conference on Harmonisation; guidance on E14  
502 Clinical Evaluation of QT/QTc Interval Prolongation and Proarrhythmic Potential for Non-  
503 Antiarrhythmic Drugs; availability. Notice. *Fed Regist*. 2005 Oct 20;70(202):61134–5.
- 504 11. MacRae CA, Vasan RS. Next Generation GWAS: Time to Focus on Phenotype? *Circ Cardiovasc*  
505 *Genet*. 2011 Aug 1;4(4):334–6.
- 506 12. MacArthur J, Bowler E, Cerezo M, Gil L, Hall P, Hastings E, et al. The new NHGRI-EBI Catalog of  
507 published genome-wide association studies (GWAS Catalog). *Nucleic Acids Res*. 2017 Jan  
508 4;45(D1):D896–901.
- 509 13. Arking DE, Pulit SL, Crotti L, Harst P van der, Munroe PB, Koopmann TT, et al. Genetic association  
510 study of QT interval highlights role for calcium signaling pathways in myocardial repolarization.  
511 *Nature Genetics*. 2014 Aug;46(8):826–36.
- 512 14. van Setten J, Brody JA, Jamshidi Y, Swenson BR, Butler AM, Campbell H, et al. PR interval genome-  
513 wide association meta-analysis identifies 50 loci associated with atrial and atrioventricular  
514 electrical activity. *Nat Commun* [Internet]. 2018 Jul 25 [cited 2018 Dec 13];9. Available from:  
515 <https://www.ncbi.nlm.nih.gov/pmc/articles/PMC6060178/>
- 516 15. Yengo L, Sidorenko J, Kemper KE, Zheng Z, Wood AR, Weedon MN, et al. Meta-analysis of genome-  
517 wide association studies for height and body mass index in ~700000 individuals of European  
518 ancestry. *Hum Mol Genet*. 2018 Oct 15;27(20):3641–9.
- 519 16. Blundell JE, Dulloo AG, Salvador J, Frühbeck G. Beyond BMI - Phenotyping the Obesities. *Obes*  
520 *Facts*. 2014 Oct;7(5):322–8.
- 521 17. Syeda F, Kirchhof P, Fabritz L. PITX2-dependent gene regulation in atrial fibrillation and rhythm  
522 control. *J Physiol (Lond)*. 2017 15;595(12):4019–26.

- 523 18. Sankar PL, Parker LS. The Precision Medicine Initiative's All of Us Research Program: an agenda for  
524 research on its ethical, legal, and social issues. *Genetics in Medicine*. 2017 Jul;19(7):743–50.
- 525 19. VanderWeele TJ, Asomaning K, Tchetgen Tchetgen EJ, Han Y, Spitz MR, Shete S, et al. Genetic  
526 variants on 15q25.1, smoking, and lung cancer: an assessment of mediation and interaction. *Am J*  
527 *Epidemiol*. 2012 May 15;175(10):1013–20.
- 528 20. Kichaev G, Yang W-Y, Lindstrom S, Hormozdiari F, Eskin E, Price AL, et al. Integrating Functional  
529 Data to Prioritize Causal Variants in Statistical Fine-Mapping Studies. *PLOS Genetics*. 2014 Oct  
530 30;10(10):e1004722.
- 531 21. Bustamante CD, De La Vega FM, Burchard EG. Genomics for the world. *Nature*. 2011 Jul  
532 14;475(7355):163–5.
- 533 22. Colby SL, Ortman JM. Projections of the Size and Composition of the U.S. Population: 2014 to  
534 2060. *Population Estimates and Projections*. P25-1143 [Internet]. US  
535 Census Bureau; 2015 [cited 2018 Dec 8]. Available from: <https://eric.ed.gov/?id=ED578934>
- 536 23. Shibao CA, Celedonio JE, Ramirez CE, Love-Gregory L, Arnold AC, Choi L, et al. A Common CD36  
537 Variant Influences Endothelial Function and Response to Treatment with Phosphodiesterase 5  
538 Inhibition. *J Clin Endocrinol Metab*. 2016;101(7):2751–8.
- 539 24. Avery CL, He Q, North KE, Ambite JL, Boerwinkle E, Fornage M, et al. A phenomics-based strategy  
540 identifies loci on APOC1, BRAP, and PLCG1 associated with metabolic syndrome phenotype  
541 domains. *PLoS Genet*. 2011 Oct;7(10):e1002322.
- 542 25. Gautam S, Agrawal CG, Banerjee M. CD36 gene variants in early prediction of type 2 diabetes  
543 mellitus. *Genet Test Mol Biomarkers*. 2015 Mar;19(3):144–9.
- 544 26. Love-Gregory L, Abumrad NA. CD36 genetics and the metabolic complications of obesity. *Curr Opin*  
545 *Clin Nutr Metab Care*. 2011 Nov;14(6):527–34.
- 546 27. Elbers CC, Guo Y, Tragante V, van Iperen EPA, Lanktree MB, Castillo BA, et al. Gene-centric meta-  
547 analysis of lipid traits in African, East Asian and Hispanic populations. *PLoS ONE*.  
548 2012;7(12):e50198.
- 549 28. Musunuru K, Romaine SPR, Lettre G, Wilson JG, Volcik KA, Tsai MY, et al. Multi-ethnic analysis of  
550 lipid-associated loci: the NHLBI CARE project. *PLoS ONE*. 2012;7(5):e36473.
- 551 29. Ellis J, Lange EM, Li J, Dupuis J, Baumert J, Walston JD, et al. Large multiethnic Candidate Gene  
552 Study for C-reactive protein levels: identification of a novel association at CD36 in African  
553 Americans. *Hum Genet*. 2014 Aug;133(8):985–95.
- 554 30. Love-Gregory L, Sherva R, Sun L, Wasson J, Schappe T, Doria A, et al. Variants in the CD36 gene  
555 associate with the metabolic syndrome and high-density lipoprotein cholesterol. *Hum Mol Genet*.  
556 2008 Jun 1;17(11):1695–704.

- 557 31. O'Neal WT, Singleton MJ, Roberts JD, Tereshchenko LG, Sotoodehnia N, Chen LY, et al. Association  
558 Between QT-Interval Components and Sudden Cardiac Death: The ARIC Study (Atherosclerosis Risk  
559 in Communities). *Circulation: Arrhythmia and Electrophysiology* [Internet]. 2017 Oct [cited 2019  
560 Feb 28];10(10). Available from: <https://www.ahajournals.org/doi/10.1161/CIRCEP.117.005485>
- 561 32. Chugh SS. Sudden cardiac death in 2017: Spotlight on prediction and prevention. *Int J Cardiol*. 2017  
562 Jun 15;237:2–5.
- 563 33. Lemaitre RN, Johnson CO, Hesselson S, Sotoodehnia N, Sotoodehnia N, McKnight B, et al. Common  
564 variation in fatty acid metabolic genes and risk of incident sudden cardiac arrest. *Heart Rhythm*.  
565 2014 Mar;11(3):471–7.
- 566 34. Johnson CO, Lemaitre RN, Fahrenbruch CE, Hesselson S, Sotoodehnia N, McKnight B, et al.  
567 Common variation in fatty acid genes and resuscitation from sudden cardiac arrest. *Circ Cardiovasc*  
568 *Genet*. 2012 Aug 1;5(4):422–9.
- 569 35. Bunt M van de, Cortes A, Consortium I, Brown MA, Morris AP, McCarthy MI. Evaluating the  
570 Performance of Fine-Mapping Strategies at Common Variant GWAS Loci. *PLOS Genetics*. 2015 Sep  
571 25;11(9):e1005535.
- 572 36. Mensah-Ablorh A, Lindstrom S, Haiman CA, Henderson BE, Marchand LL, Lee S, et al. Meta-  
573 Analysis of Rare Variant Association Tests in Multiethnic Populations. *Genetic Epidemiology*. 2016  
574 Jan 1;40(1):57–65.
- 575 37. Design of the Women's Health Initiative Clinical Trial and Observational Study. *Controlled Clinical*  
576 *Trials*. 1998 Feb 1;19(1):61–109.
- 577 38. THE ATHEROSCLEROSIS RISK IN COMMUNIT (ARIC) STUIY: DESIGN AND OBJECTWES. *Am J*  
578 *Epidemiol*. 1989 Apr 1;129(4):687–702.
- 579 39. Sorlie PD, Avilés-Santa LM, Wassertheil-Smoller S, Kaplan RC, Daviglius ML, Giachello AL, et al.  
580 Design and Implementation of the Hispanic Community Health Study/Study of Latinos. *Annals of*  
581 *Epidemiology*. 2010 Aug 1;20(8):629–41.
- 582 40. Bild DE, Bluemke DA, Burke GL, Detrano R, Roux D, V A, et al. Multi-Ethnic Study of Atherosclerosis:  
583 Objectives and Design. *Am J Epidemiol*. 2002 Nov 1;156(9):871–81.
- 584 41. Wojcik G, Graff M, Nishimura KK, Tao R, Haessler J, Gignoux CR, et al. Genetic Diversity Turns a  
585 New PAGE in Our Understanding of Complex Traits. 2017 Sep 15;
- 586 42. Willer CJ, Li Y, Abecasis GR. METAL: fast and efficient meta-analysis of genomewide association  
587 scans. *Bioinformatics*. 2010 Sep 1;26(17):2190–1.
- 588 43. Kim J, Bai Y, Pan W. An Adaptive Association Test for Multiple Phenotypes with GWAS Summary  
589 Statistics. *Genet Epidemiol*. 2015 Dec 1;39(8):651–63.

- 590 44. Wojcik G, Graff M, Nishimura KK, Tao R, Haessler J, Gignoux CR, et al. The PAGE Study: How  
591 Genetic Diversity Improves Our Understanding of the Architecture of Complex Traits. *Nature*. (In  
592 press);188094.
- 593 45. Price AL, Patterson NJ, Plenge RM, Weinblatt ME, Shadick NA, Reich D. Principal components  
594 analysis corrects for stratification in genome-wide association studies. *Nature Genetics*. 2006  
595 Aug;38(8):904–9.
- 596 46. Lin D-Y, Tao R, Kalsbeek WD, Zeng D, Gonzalez F, Fernández-Rhodes L, et al. Genetic Association  
597 Analysis under Complex Survey Sampling: The Hispanic Community Health Study/Study of Latinos.  
598 *The American Journal of Human Genetics*. 2014 Dec 4;95(6):675–88.
- 599 47. Prins BP, Mead TJ, Brody JA, Sveinbjornsson G, Ntalla I, Bihlmeyer NA, et al. Exome-chip meta-  
600 analysis identifies novel loci associated with cardiac conduction, including ADAMTS6. *Genome Biol*  
601 [Internet]. 2018 Jul 17 [cited 2018 Dec 13];19. Available from:  
602 <https://www.ncbi.nlm.nih.gov/pmc/articles/PMC6048820/>

603
